# Supplementary material
Source: publisher figshare collection journal article supplement (https://karger.figshare.com/ndownloader/files/9408340)
Supplement: Supplementary file 1 [file 9408340]

##### Tabela S1 – Categorias Adicionais não contempladas no Core Set

|  | | **Avaliação Inicial**  **n (%)** | **Avaliação Final**  **n (%)** |
| --- | --- | --- | --- |
| **Atividades/Participação** | | | |
| **d4551** | **Subir/Descer** |  |  |
|  | Limitação Ausente | 10 (2,2) | 50 (11,1) |
|  | Limitação Presente | 441 (97,8) | 401 (88,9) |
| **d620** | **Aquisição de Bens e Serviços** |  |  |
|  | Limitação Ausente | 5 (1,1) | 30 (6,7) |
|  | Limitação Presente | 446 (98,9) | 421 (93,3) |
| **d630** | **Preparar Refeições** |  |  |
|  | Limitação Ausente | 7 (1,6) | 48 (10,6) |
|  | Limitação Presente | 444 (98,4) | 403 (89,4) |
| **d640** | **Realizar as Tarefas Domésticas** |  |  |
|  | Limitação Ausente | 10 (2,2) | 37 (8,2) |
|  | Limitação Presente | 441(97,8) | 414 (91,8) |

##### Tabela S2 – Variáveis dos Modelos e Categorias ICF

| **Variáveis dos Modelos** | | **Categorias ICF** | **Informação Adicional da Variável/Categoria ICF** |
| --- | --- | --- | --- |
| Presença de Equipa Multidisciplinar | e355: Apoio e Relacionamentos dos Profissionais de Saúde | Apoio prático físico ou emocional dos profissionais de saúde. Não engloba as “Atitudes” das pessoas que dão esse apoio. |
| Rácio Doentes/Terapeuta | e355 | Idem |
| Prática de Culto | d930: Religião e Espiritualidade | Participar em atividades religiosas ou espirituais, em organizações e práticas para satisfação pessoal. Inclui religião e espiritualidade organizadas. |
| Internamentos Hospitalares Anteriores | ------- | Fator Pessoal. Este componente ainda não está contemplado na Classificação |
| Comunicação Telefónica com a Família | e310: Apoio e Relacionamentos da família próxima  e315: Apoio e Relacionamentos da família alargada  e410: Atitudes individuais de membros da família próxima  e415: Atitudes individuais de membros da família alargada | Considerámos a “família próxima” e a “família alargada”, quer enquanto “Apoio e Relacionamentos”, quer enquanto “Atitudes” |
| Funções Emocionais | b152: Funções Emocionais | Funções mentais específicas relacionadas com o sentimento e a componente afetiva dos processos mentais |
| Mobilidade | d410: Mudar a posição básica do corpo  d420: Auto transferências  d455: Deslocar-se  d460: Deslocar-se por diferentes locais  d470: Utilização de transportes  e115: Produtos e tecnologias para uso pessoal na vida diária  e120: Produtos e tecnologias destinados a facilitar a mobilidade e o transporte pessoal em ambientes interiores e exteriores | Foram consideradas as seis variáveis que fizeram parte da Mobilidade. Considerámos também a necessidade de ortóteses visuais e auditivas (e115) e auxiliares de marcha (e120) para o desempenho dessas atividades. |
| “Usar Telefone” | d360: Utilização de dispositivos e de técnicas de comunicação | Inclui: utilização de dispositivos de telecomunicações |
| Perceção Estado de Saúde Mental | ------- | Fator Pessoal. Idem |
| “Gerir Dinheiro” | d860: Transações Económicas Básicas | Só considerámos as “Transações Económicas Básicas”, dada a idade e a escolaridade da amostra. Inclui participar em qualquer forma de transação económica simples, como utilizar dinheiro para comprar comida. |
| Idade | ------- | Fator Pessoal. Idem |
| Atividade Física | d920: Recreação e lazer | Inclui: jogos e desportos |
| Queixas de Saúde | b210: Funções da visão  b230: Funções auditivas  b280: Sensação de dor  b820: Funções reparadoras da pele | De acordo com as prevalências observadas no processo de avaliação. |
| Possuir Crença Religiosa | ------- | Fator Pessoal. Idem |
| Perceção Estado de Saúde Física | ------- | Fator Pessoal. Idem |
| Funções Mentais | b114: Funções da orientação | Inclui as funções de orientação do tempo e do lugar. |
| Auto Cuidados | d510: lavar-se  d530: Cuidados relacionados com os processos de excreção  d540: Vestir-se  d550: Comer  d570: Cuidar da própria saúde  e115; e120 | Foram consideradas as cinco variáveis que fizeram parte dos Auto Cuidados. Considerámos também a necessidade de ortóteses visuais e auditivas (e115) e auxiliares de marcha (e120) para o desempenho destas atividades. |
| Continência | b525: Funções da defecação  b620: Funções miccionais | Inclui a incontinência fecal e urinária |
| Sexo | ------- | Fator Pessoal. Idem |
| Escolaridade | ------- | Fator Pessoal. Idem |
| Vida Doméstica | d620: Aquisição de bens e serviços  d630: Preparar refeições  d640: Realizar as tarefas domésticas  e115; e120 | Foram consideradas as quatro variáveis que fizeram parte da Vida Doméstica. A categoria d640 engloba a “lida da casa” e “lavar/tratar da roupa”. Considerámos também a necessidade de ortóteses visuais e auditivas (e115) e auxiliares de marcha (e120) para o desempenho destas atividades. |
